# Supplementary material
Source: publisher figshare collection journal article supplement (https://gsajournals.figshare.com/ndownloader/files/26480471)
Supplement: Supplementary file 1 [file 26480471]

## Sheet: Sheet1
Omyk_1.0	Start1 (Mb)	End1 (Mb)	OmykA_1.0	Start2 (Mb)	End2 (Mb)	Size (Mbp)	in_contig	contig_length
Omy03	19.2	22.5	OmyA03	15.6	19.1	3.5	tig00001677	15799178
Omy04	43.1	47.1	OmyA04_Omy04q	0.2	4.2	4	tig00000001_37611129-63163401	25552273
Omy04	65.7	69.5	OmyA04_Omy04q	23.2	27.3	4.1	tig00000113	14759346
Omy12	70.4	74.3	OmyA12	73.4	77.4	4	tig00103993	22800323
Omy13	55.3	58.5	OmyA13	58.7	61.1	2.4	tig00003491	4543134
Omy19	16.5	20.7	OmyA19	19.5	23.8	4.3	tig00004270	3894920
Omy20	16.4	19.5	OmyA20	18.8	21.7	2.9	tig00001481	17108245
Omy23	0	2.3	OmyA23	10.1	12.3	2.2	tig00000002	52868405
Omy23	46.8	49.1	OmyA23	57.7	60.1	2.4	tig00000002	52868405
Omy24	0	1.2	OmyA24	3.2	4.5	1.3	tig00005389	4485128
Omy24	27.2	28.8	OmyA24	28.5	30.9	2.4	tig00001325	18536747
Omy26	0.3	1.6	OmyA26	10.1	11.4	1.3	tig00000991	22983028
Omy26	36.8	38.5	OmyA26	46.7	47.8	1.1	tig00003702	7514166
Omy27	30.4	31.7	OmyA27	30.9	32.5	1.6	tig00104013	2411248
Omy29	34.5	36.1	ChrY	35.8	37.4	1.6	tig00006181	3599797
